# Supplementary material
Source: PubMed Central journal article supplement (PMC4188279)

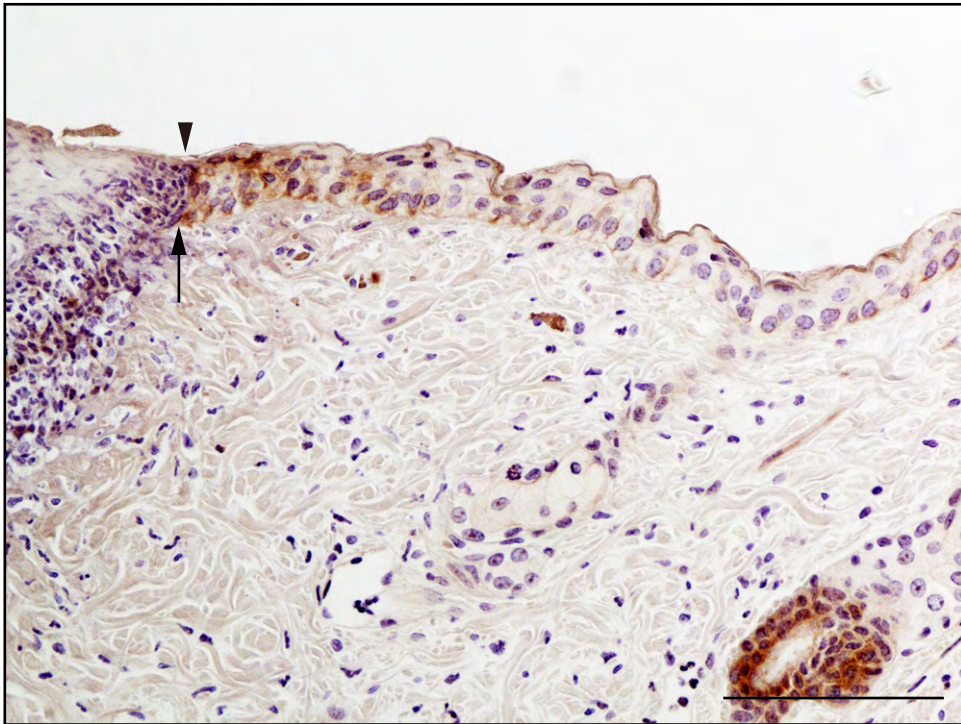

**Figure S1**

Supplement: mmc1.pdf [file mmc1.pdf]

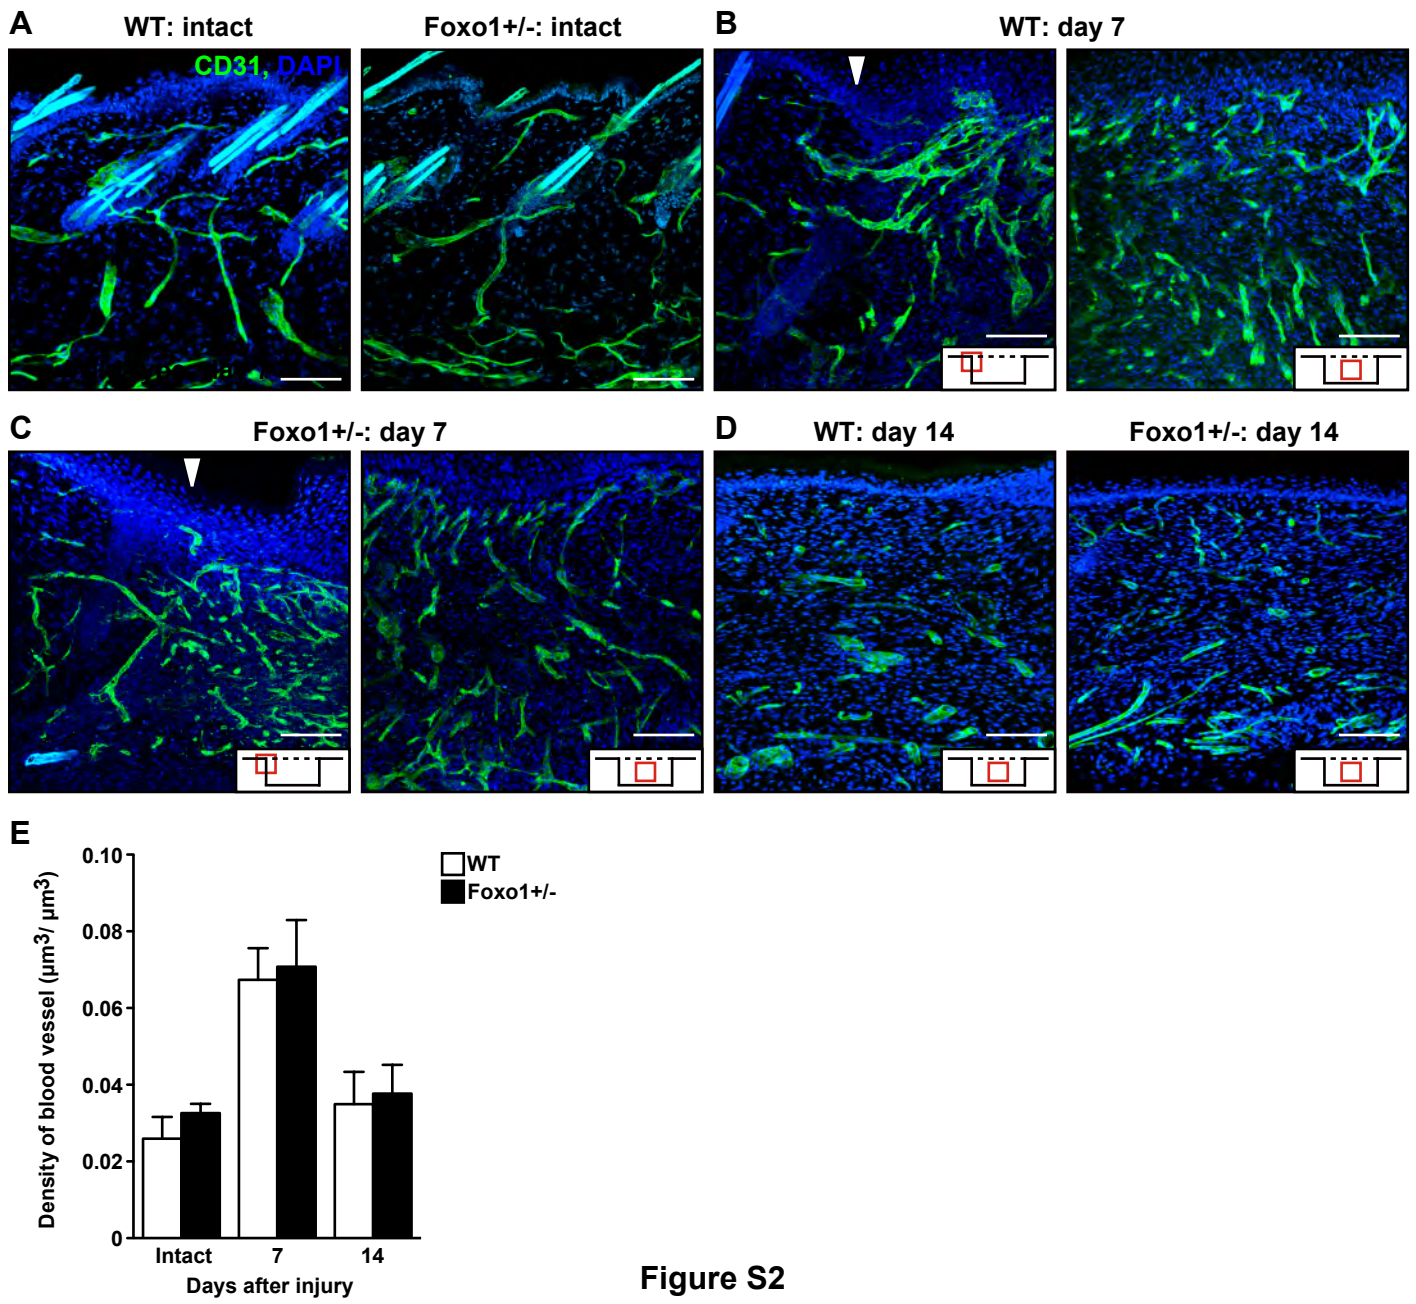

Figure S2

Supplement: mmc2.pdf [file mmc2.pdf]

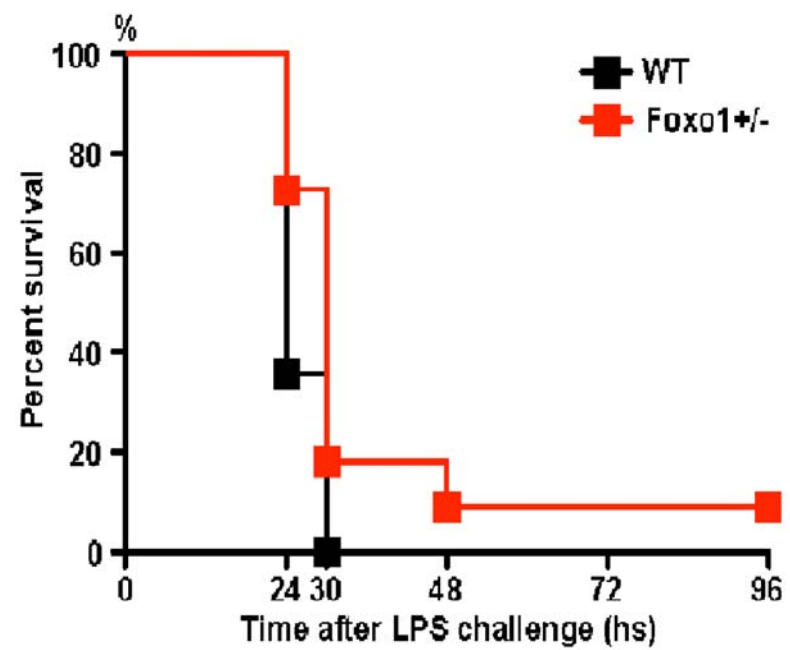

Figure S3

Supplement: mmc3.pdf [file mmc3.pdf]

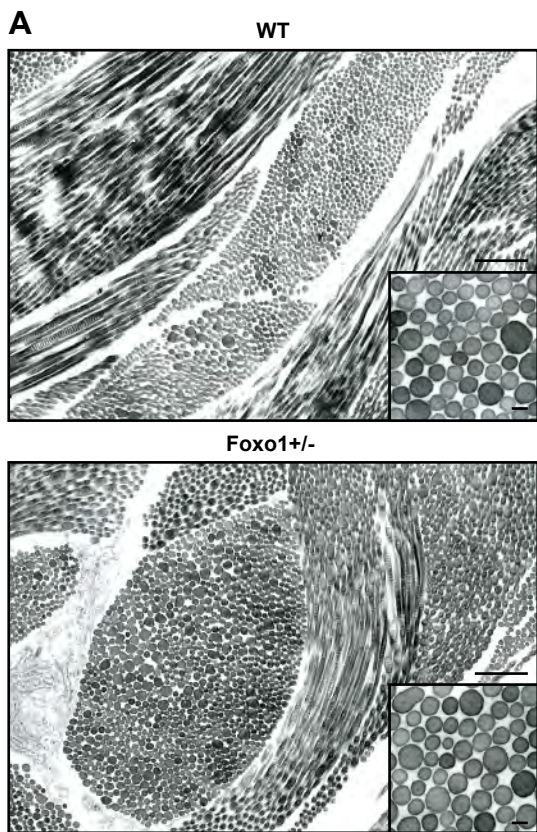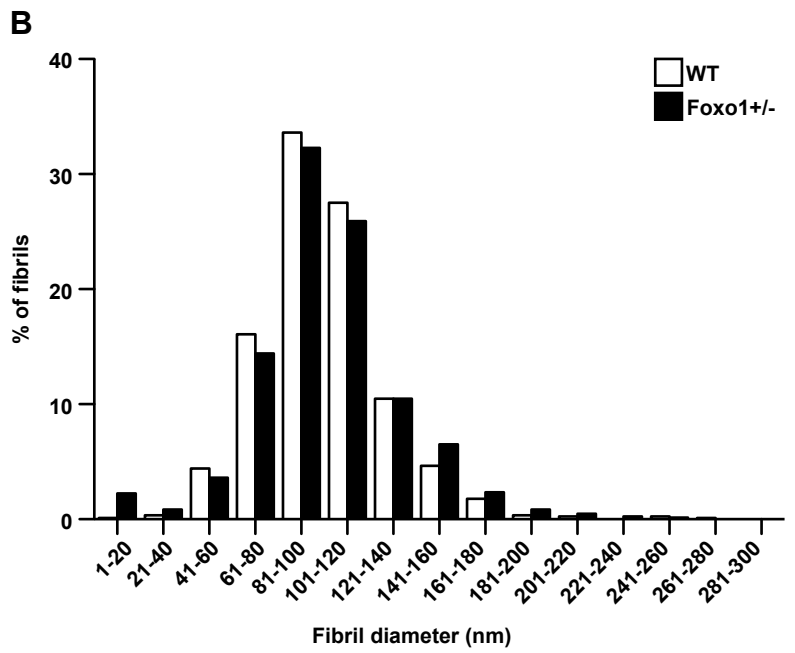

|          | Mean $\pm$ SEM    | Number of fibrils | Number of mice |
|----------|-------------------|-------------------|----------------|
| WT       | 99.84 $\pm$ 0.943 | 839               | 5              |
| Foxo1+/- | 102.3 $\pm$ 1.698 | 864               | 5              |

**Figure S4**

Supplement: mmc4.pdf [file mmc4.pdf]

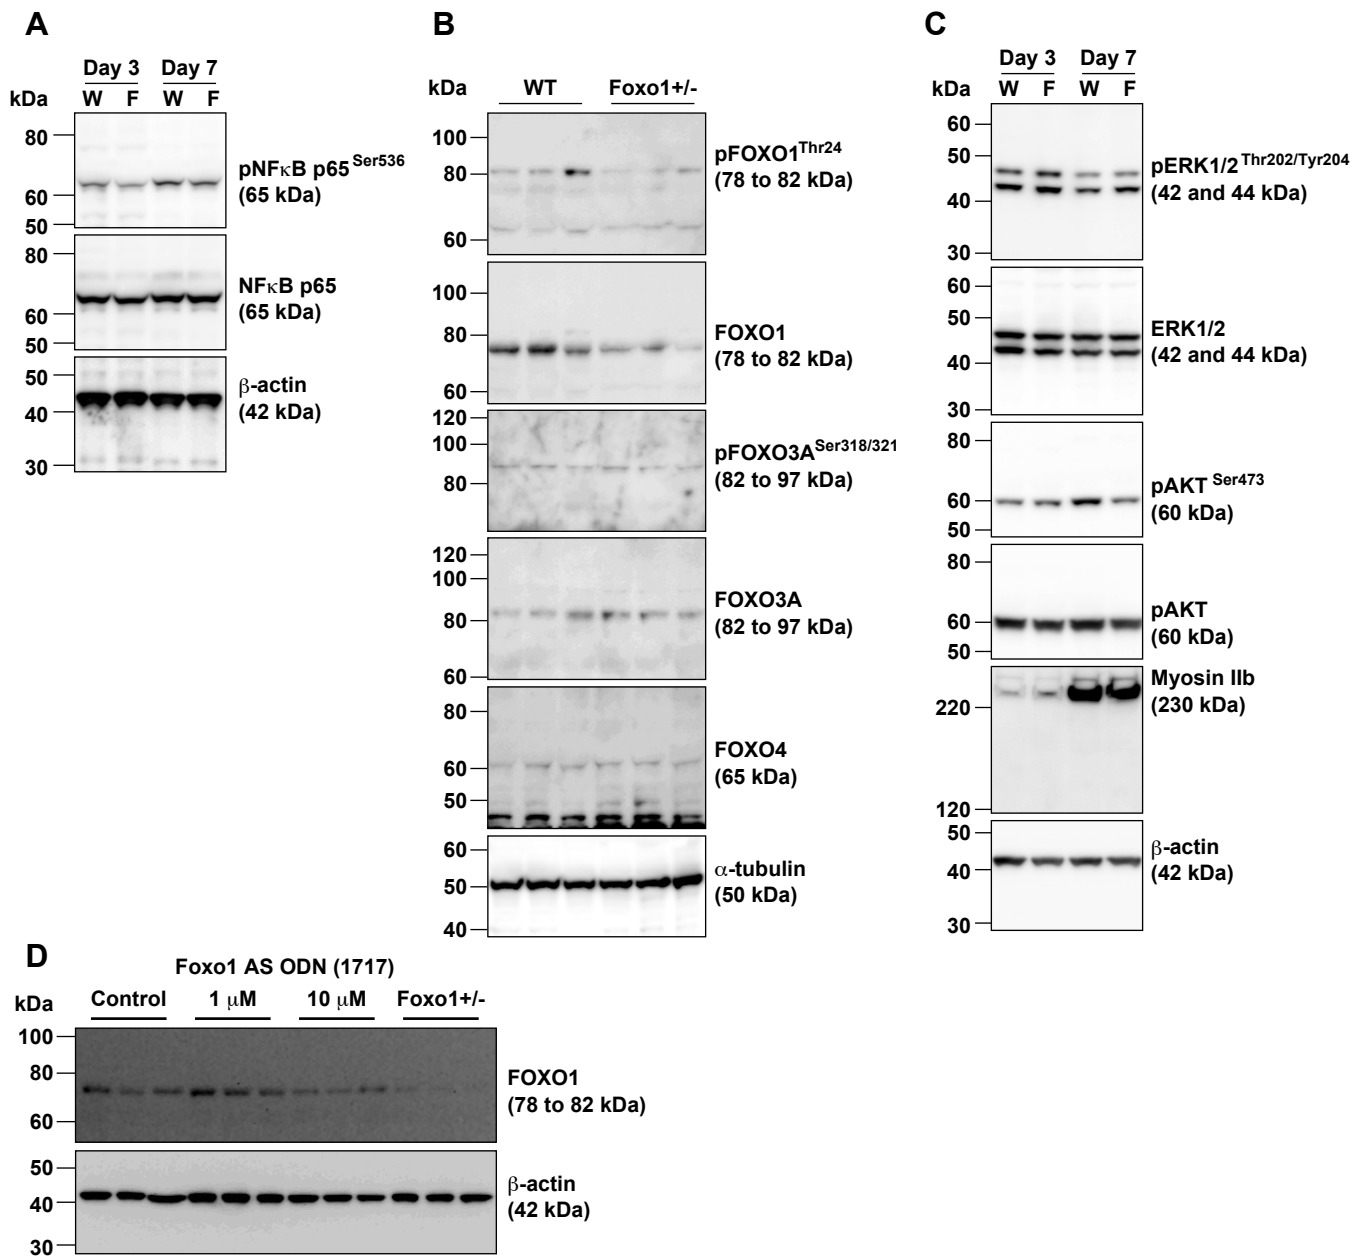

Figure S5

Supplement: mmc5.pdf [file mmc5.pdf]
